# Supplementary material
Source: Elsevier journal article supplement (https://authors.library.caltech.edu/50169/7/mmc1.xlsx)
Supplement: mmc1 [file mmc1.xlsx]

## Sheet: RAP-RNA Statistics
SAMPLE	RAP_TARGET	BATCH	CROSSLINKING	LYSIS_HYB_PROTOCOL	READS_PASSING_CLIPPING	READS_MAPPING_TO_REPEAT_RNA	TOPHAT_UNMAPPED_READS	TOPHAT_ALIGNED_READS	MEDIAN_INSERT_SIZE
Input-RNA-AMT-131108	Input	131108	+AMT	AMT	35344950	30931064	3069464	1344422	70
Input-RNA-noAMT-131108	Input	131108	-AMT	AMT	41187048	32845312	4007280	4334456	97
U1-RAP-RNA-AMT-131108	U1	131108	+AMT	AMT	26473570	22841834	3288966	342770	71
U1-RAP-RNA-noAMT-131108	U1	131108	-AMT	AMT	38006962	31897124	5592470	517368	124
Input-RNA-AMT-140203	Input	140203	+AMT	AMT	35087048	32137892	1698186	997050	88
Input-RNA-140203	Input	140203	FA-DSG	FA-DSG	57102742	48409536	3816628	4652214	135
Input-RNA-NonCrosslinked-140203	Input	140203	None	FA-DSG	22633182	18408568	1892312	2271882	141
Input-RNA-noAMT-140203	Input	140203	-AMT	AMT	30461002	24189182	2247064	3862274	133
Malat1-RAP-RNA-AMT-140203	Malat1	140203	+AMT	AMT	23321248	3837316	9579900	8680536	74
Malat1-RAP-RNA-noAMT-140203	Malat1	140203	-AMT	AMT	36814556	2729032	8012542	25165460	98
U1-RAP-RNA-AMT-140203	U1	140203	+AMT	AMT	19592540	7945558	9433350	640488	84
U1-RAP-RNA-140203	U1	140203	FA-DSG	FA-DSG	95839622	23590522	15657144	56349886	121
U1-RAP-RNA-NonCrosslinked-140203	U1	140203	None	FA-DSG	17764114	14326440	2884822	525164	123
U1-RAP-RNA-noAMT-140203	U1	140203	-AMT	AMT	17734446	7953464	8043898	351128	167
Hdac2-RAP-RNA-131124	Hdac2	131124	FA-DSG	FA-DSG	16182174	5863192	5763852	4469978	132
Input-RNA-131124	Input	131124	FA-DSG	FA-DSG	78383772	61322570	5850558	10950634	106
Malat1-RAP-RNA-131124	Malat1	131124	FA-DSG	FA-DSG	77093510	8651840	10542614	57296774	97
Input-RNA-AMT-140425	Input	140425	+AMT	AMT	25879330	22080178	2191928	1607224	94
Input-RNA-noAMT-140425	Input	140425	-AMT	AMT	45892326	33938998	4744270	7209058	155
Snora73a-RAP-RNA-AMT-140425	Snora73a	140425	+AMT	AMT	7708802	1227200	6444468	37134	93
Snora73a-RAP-RNA-noAMT-140425	Snora73a	140425	-AMT	AMT	6644848	1812728	4755584	76536	139
U3-RAP-RNA-AMT-140425	U3	140425	+AMT	AMT	9442418	5207332	4216042	19044	104
U3-RAP-RNA-noAMT-140425	U3	140425	-AMT	AMT	9307940	4814080	4452502	41358	125
Input-RNA-FA-140503	Input	140503	FA	FA	24130686	21236850	1462478	1431358	105
Snora73a-RAP-RNA-FA-140503	Snora73a	140503	FA	FA	36990174	30556904	4128360	2304910	114
U1-RAP-RNA-FA-140503	U1	140503	FA	FA	35138484	14963714	5314190	14860580	127
U12-RAP-RNA-FA-140503	U12	140503	FA	FA	14898228	3998602	8239688	2659938	116
U3-RAP-RNA-FA-140503	U3	140503	FA	FA	41171486	37564118	2641014	966354	124
Malat1-RAP-RNA-FA-140503	Malat1	140503	FA	FA	27106250	5755332	4340510	17010408	96
Input-RNA-140503	Input	140503	FA-DSG	FA-DSG	23437008	20399062	1434452	1603494	123
Malat1-RAP-RNA-140503	Malat1	140503	FA-DSG	FA-DSG	34013836	6689256	5519030	21805550	105
U1-RAP-RNA-140503	U1	140503	FA-DSG	FA-DSG	26965750	6276774	4690198	15998778	125
U3-RAP-RNA-140503	U3	140503	FA-DSG	FA-DSG	20880620	16140076	2971788	1768756	125
Xist-RAP-RNA-140503	Xist	140503	FA-DSG	FA-DSG	18821954	8081438	4696782	6043734	108

## Sheet: RAP-DNA Statistics
SAMPLE	RAP_TARGET	BATCH	UNPAIRED_READS_EXAMINED	READ_PAIRS_EXAMINED	UNMAPPED_READS	PERCENT_DUPLICATION	MEDIAN_INSERT_SIZE
Malat1-RAP-DNA-130928	Malat1	130928	459779	19723654	1180535	0.104301	212
Input-DNA-130928	Input	130928	5242682	111534037	10253158	0.15738	187
Input-DNA-DMSO-140120	Input	140120	765923	31515944	1425751	0.036566	209
Input-DNA-Flavopiridol-140120	Input	140120	796578	30687078	1474926	0.037289	211
Malat1-RAP-DNA-DMSO-140120	Malat1	140120	739106	14708827	2153362	0.482432	218
Malat1-RAP-DNA-Flavopiridol-140120	Malat1	140120	633078	13107773	1768922	0.468577	222
Input-DNA-DMSO-140216	Input	140216	957887	46178091	1906963	0.054777	215
Input-DNA-Flavopiridol-140216	Input	140216	2397671	98564179	4824661	0.074802	224
U1-RAP-DNA-DMSO-140216	U1	140216	1344595	21635800	7068979	0.515831	206
U1-RAP-DNA-Flavopiridol-140216	U1	140216	1616010	25401288	9908250	0.572512	212
Hdac2-RAP-DNA-140105	Hdac2	140105	181762	1371354	13282412	0.758051	266
Input-DNA-140105	Input	140105	282468	19663840	489068	0.015208	236
Input-DNA-130531	Input	130531	1242151	28527297	1602951	0.059572	168
Xist-RAP-DNA-130531	Xist	130531	503857	14929977	1115925	0.263592	187
